# Supplementary material for: Developing a global operational seasonal hydro-meteorological forecasting system: GloFAS v2.2 Seasonal v1.0
Source: Copernicus journal article supplement (doi:10.5194/gmd-2018-118), 2018-05-14
Supplement: Supplementary file 1 [file gmd-2018-118-supplement.zip]

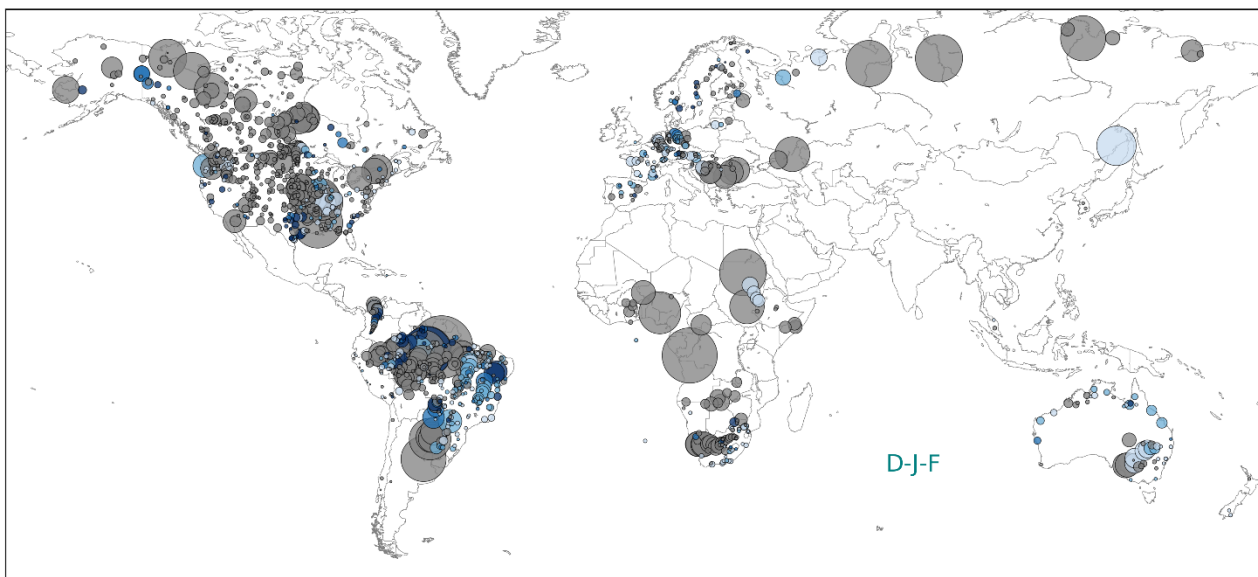

D-J-F

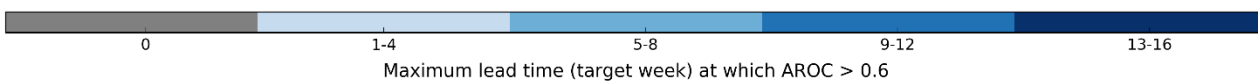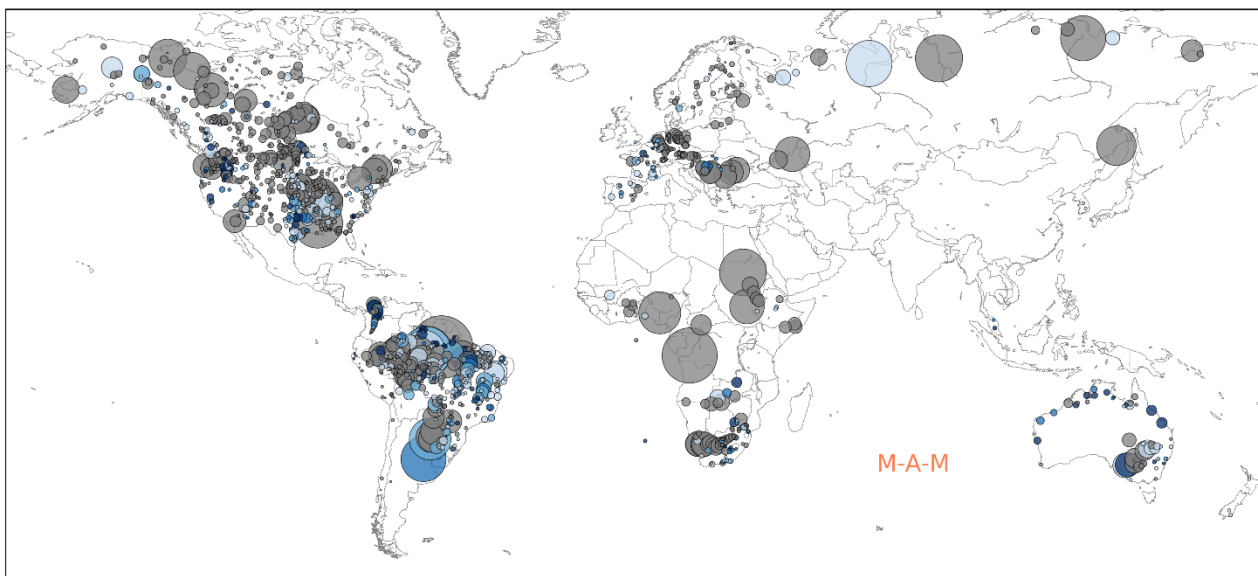

M-A-M

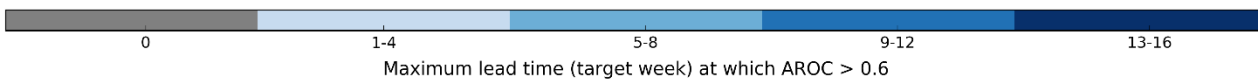

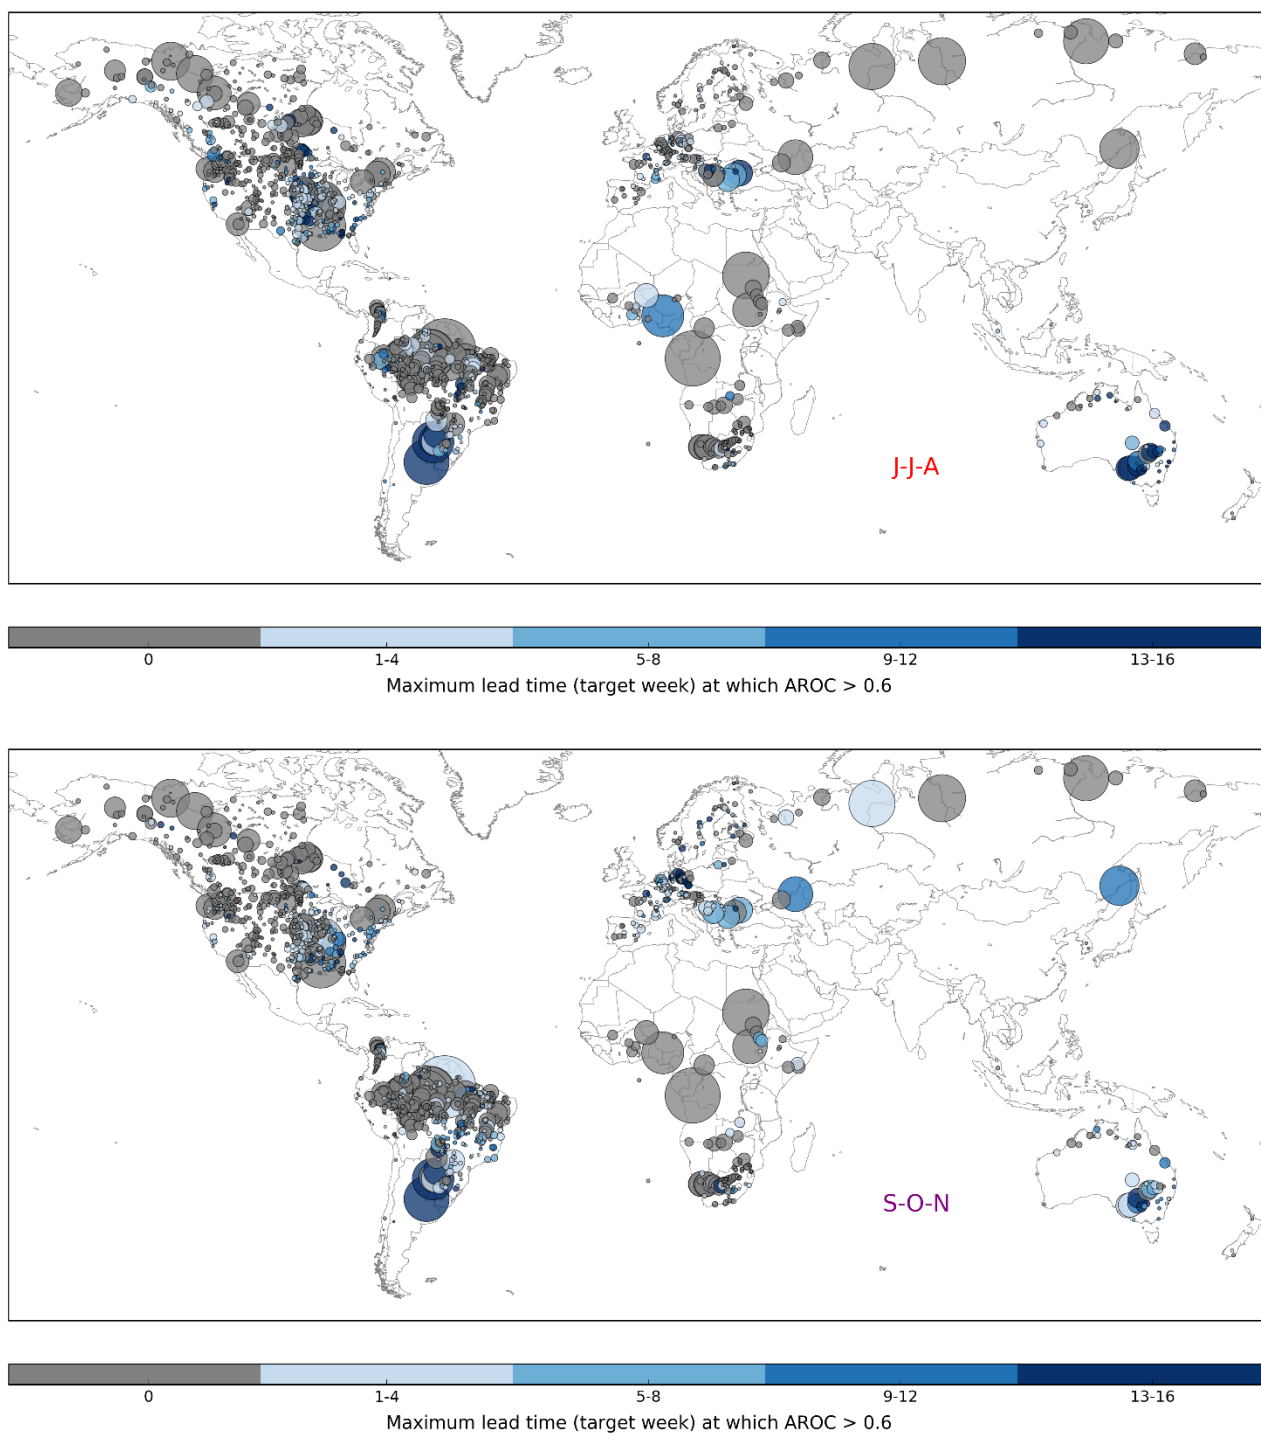

**Figure S1:** Maximum forecast lead time at which the area under the ROC curve (AROC) is greater than 0.6 for high flow events (flow exceeding the 80<sup>th</sup> percentile of climatology), at each observation station, for forecasts started in each season. This is used to indicate the maximum lead time at which forecasts are skilful. Grey dots indicate that forecasts started in that season have an AROC < 0.6 at all lead times.

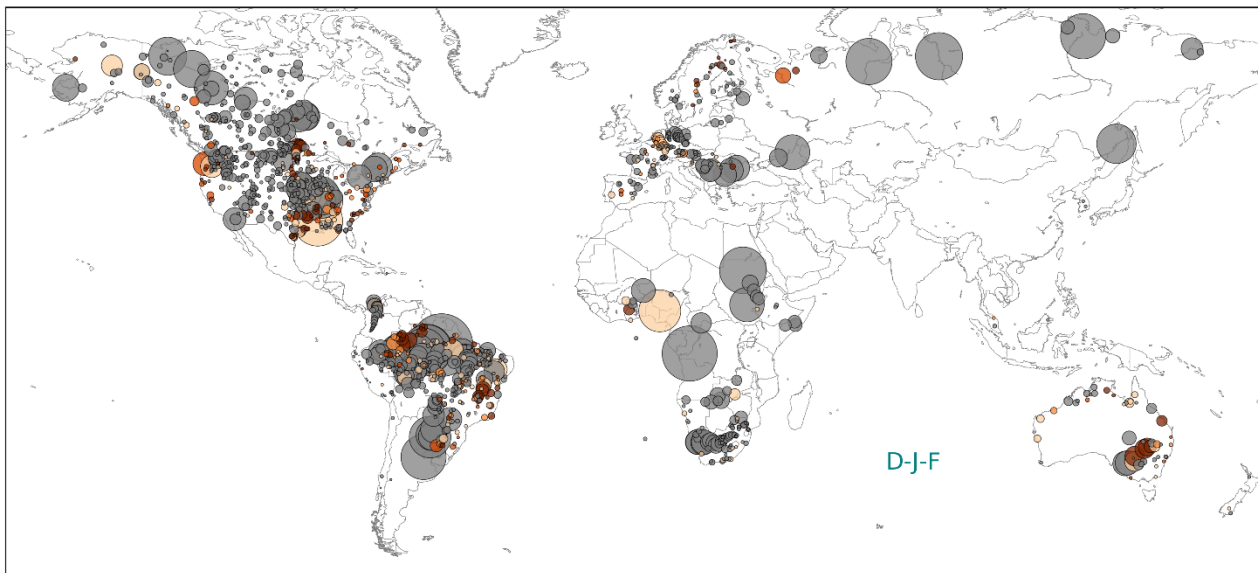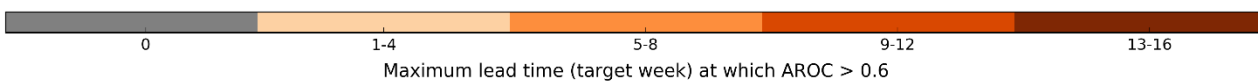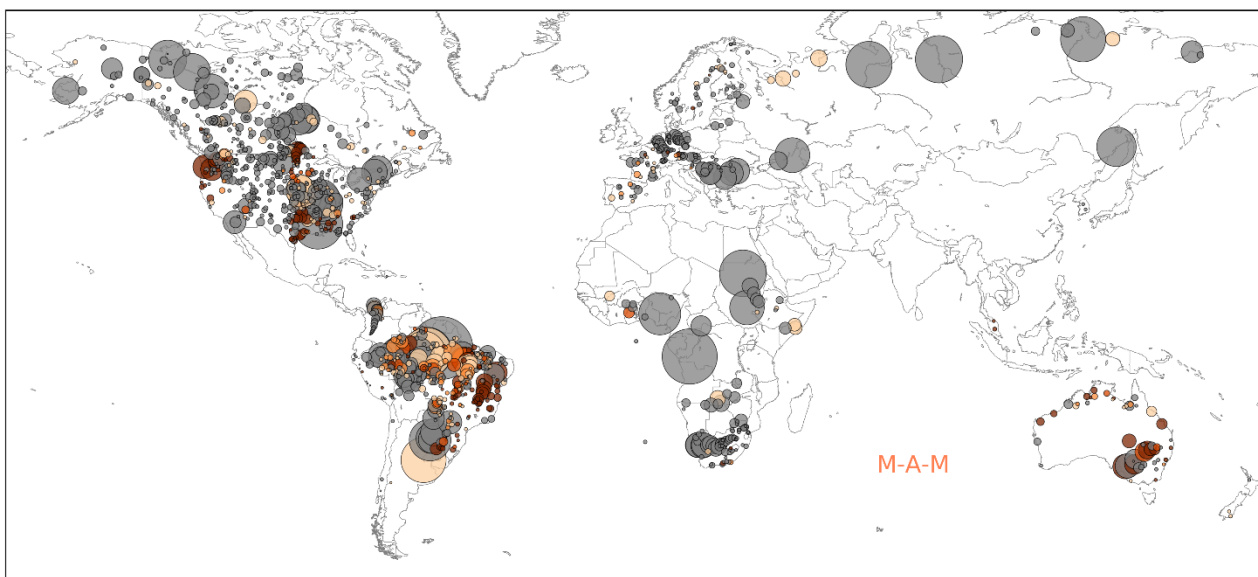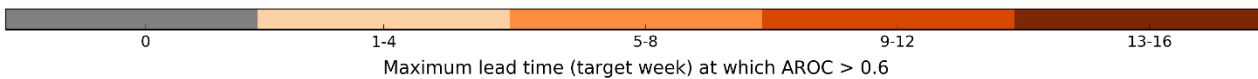

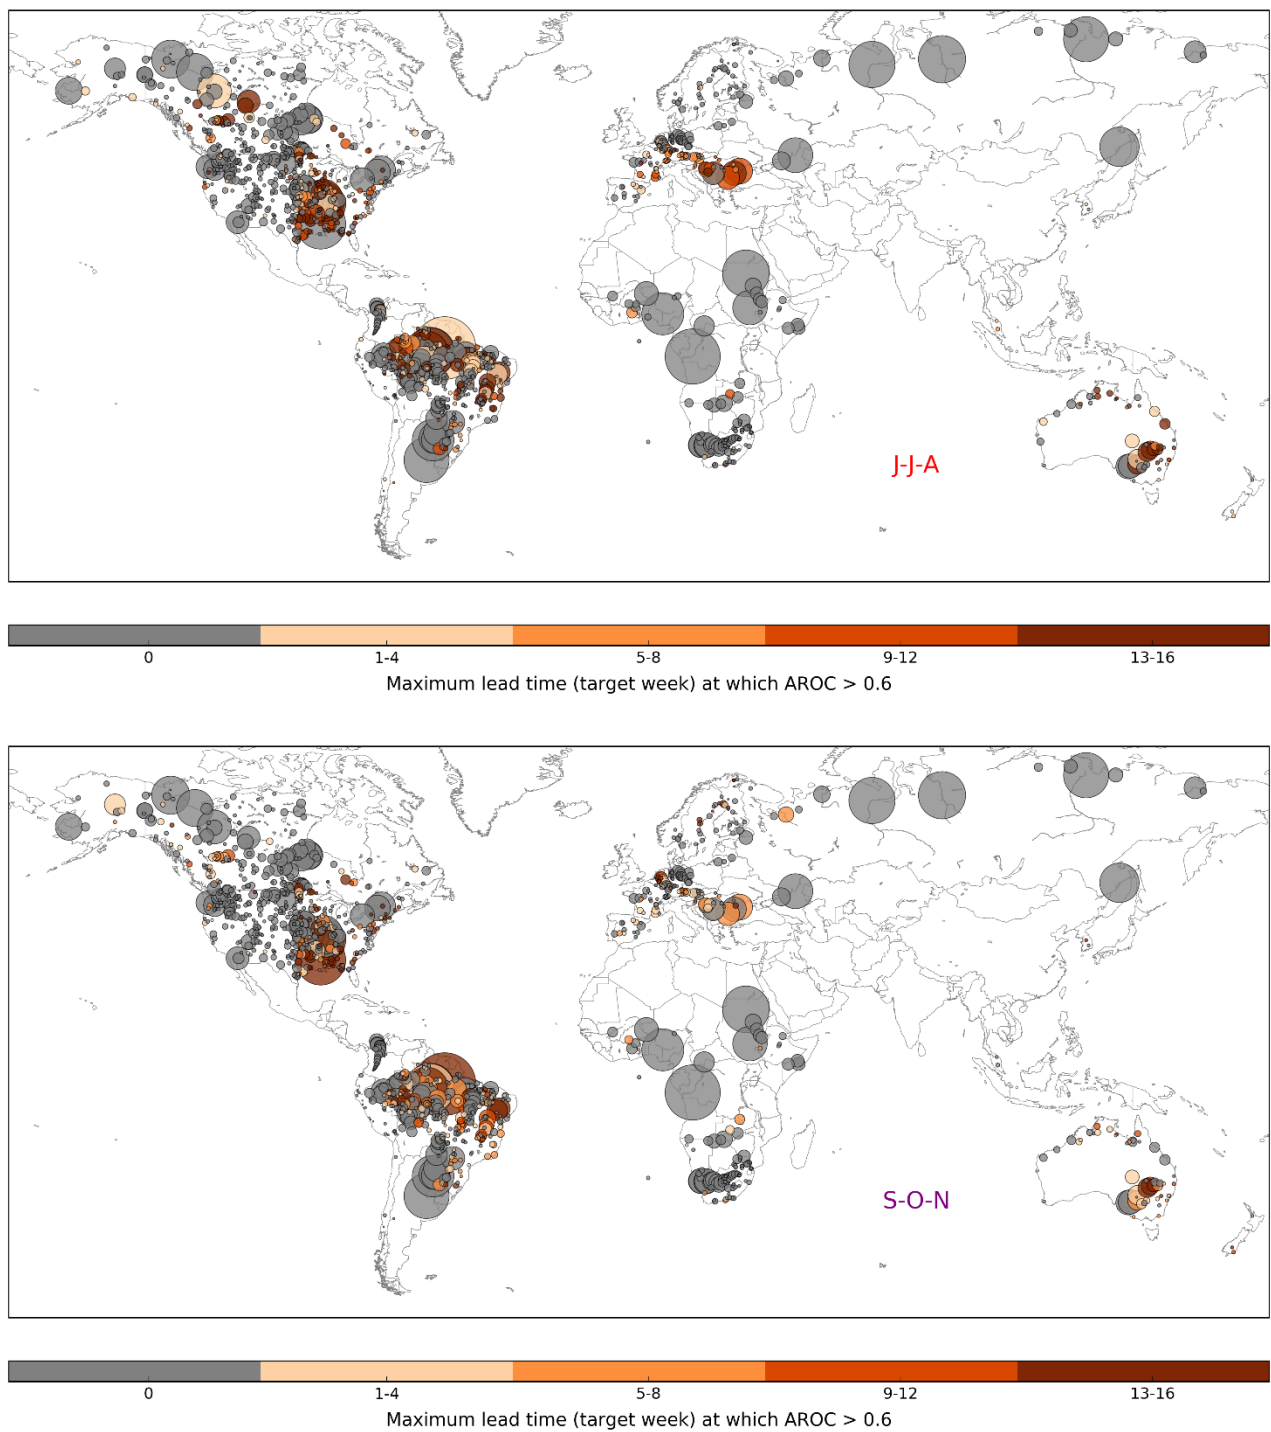

**Figure S2:** Maximum forecast lead time at which the area under the ROC curve (AROC) is greater than 0.6 for low flow events (flow below the 20<sup>th</sup> percentile of climatology), at each observation station, for forecasts started in each season. This is used to indicate the maximum lead time at which forecasts are skilful. Grey dots indicate that forecasts started in that season have an AROC < 0.6 at all lead times.
